# Supplementary material
Source: Elsevier journal article supplement (https://www.sciencedirect.com/science/article/pii/S0870255121005011)
Supplement: mmc1 [file S0870255121005011:mmc1.doc]

| **Online appendix - Frequencies of answers of multiple choices questions** | | |
| --- | --- | --- |
| **Item** | **Correct answer** | |
| **n** | **%** |
| Q13. A hipertensão prejudica o seu organismo ao longo do tempo por: | | |
| *HBP harms your body over time by* | | |
| Fazer com que tenha diabetes | 16 | 6.6 |
| *Causing you to have diabetes* |
| Fazer com que ganhe peso | 5 | 2.1 |
| *Causing you to gain weight* |
| Danificar os seus vasos sanguíneos | 170 | 70.8 |
| *Damaging your blood vessels* |
| Deixá-lo nervoso | 48 | 20 |
| *Making you nervous* |
| Q14. Porque é que a Hipertensão é chamada um "assassino silencioso"? | | |
| *Why is HBP called a ‘‘silent killer?’’* | | |
| O risco de morrer de hipertensão é baixo | 4 | 1.7 |
| *Your risk of dying from HBP is low* |
| Quando não há dor nem se sente doente é porque se está bem | 40 | 16.7 |
| *When you don’t have pain or feel ill, you are okay* |
| Pode não ter sintomas e pode por a vida em risco | 194 | 80.8 |
| *You may have no symptoms, and it can be life threatening* |
| Q15. Uma pessoa é diagnosticada com hipertensão se tiver: | | |
| *A person is diagnosed with HBP if he ⁄ she has:* | | |
| Muitas dores de cabeça que persistem há mais de 6 meses | 52 | 21.7 |
| *A lot of headaches that persist over 6 months* |
| Um familiar com hipertensão | 9 | 3.8 |
| *Family member with high blood pressure* |
| Stress e pressão constantes | 35 | 14.6 |
| *Constant stress and tension* |
| Pressão arterial elevada em 3 ocasiões diferentes | 143 | 59.6 |
| E*levated blood pressure (BP) at 3 different times* |
| Q16. Uma boa pressão arterial é: | | |
| A *good BP value is:* | | |
| Menos de 90/50 mmHg | 14 | 5.8 |
| *<90 ⁄ 50 mmHg* |
| Menos que 140/90 mmHg | 210 | 87.5 |
| *<140 ⁄ 90 mmHg* |
| 145/110 mmHg | 12 | 5 |
| *145 ⁄ 110 mmHg* |
| 180/100 mmHg | 3 | 1.3 |
| *180 ⁄ 100 mmHg* |
| Q17. Qual das seguintes afirmações é verdadeira sobre os medicamentos para a hipertensão: | | |
| *Which of the following statements is true about HBP medications?* | | |
| Há muitos tipos de medicamentos para a Hipertensão | 85 | 35.4 |
| *There are many different types of medications for HBP* |
| Deve ser tomada uma medicação extra quando a pressão arterial está alta | 44 | 18.3 |
| *Extra medication should be taken when your BP is up,* |
| Os medicamentos não devem ser tomados se se beber álcool | 95 | 39.6 |
| *Medications should not be taken if drinking alcohol* |
| Todos os medicamentos causam impotência sexual | 14 | 5.8 |
| *All BP medications cause a man to lose sex drive* |

| Q18. Qual das seguintes afirmações é falsa sobre os medicamentos para a hipertensão: | | |
| --- | --- | --- |
| *Which of the following statements is false about HBP medications?* | | |
| Tomar os medicamentos para a Hipertensão durante muito tempo pode prejudicar o seu organismo | 119 | 49.6 |
| *Taking BP medications for a long time can damage your body* |
| A partir do momento em que começa a tomar medicação tem de continuar a tomá-la a vida toda | 64 | 36.7 |
| *Once you start taking medication, you have to take it for life* |
| Mesmo que se sinta bem tem de tomar a medicação como o prescrito | 42 | 17.5 |
| *Even when you feel good, you have to take your medication as scheduled* |
| Quando sente que a dose dos medicamentos deve ser alterada, deve falar primeiro com o seu médico | 14 | 5.8 |
| *When you feel that you need to adjust your dose of medication, you first need to see your doctor* |
| Q19. Todos os seguintes problemas de saúde podem ser provocados pela hipertensão, exceto: | | |
| *All of the following health problems can result from HBP, except:* | | |
| Ataque cardiac | 29 | 12.1 |
| *Heart attack* |
| Artrite | 165 | 68.8 |
| *Arthritis* |
| AVC | 15 | 6.3 |
| *Stroke* |
| Insuficiência Renal | 30 | 12.5 |
| *Kidney failure* |
| Q20. Todas as seguintes afirmações são alterações que pode fazer na sua dieta para reduzir a sua pressão arterial, exceto: | | |
| *All of the following are changes that you can make in your diet to lower your HBP, except:* | | |
| Comer frango assado em vez de frito | 21 | 8.8 |
| *Eat baked chicken instead of fried* |
| Parar de comer batatas fritas | 11 | 4.6 |
| *Stop eating potato chips* |
| Evitar adicionar sal de mesa à comida | 23 | 9.6 |
| *Avoid adding table salt to food* |
| Comer fast-food ou fritos | 184 | 76.7 |
| *Eat fast food or fried foods* |
| Q21. Todas as seguintes alterações do estilo de vida podem ajudar a baixar a sua pressão arterial, exceto: | | |
| *All of these lifestyle changes might help lower your BP, except:* | | |
| Levantar 50Kg | 172 | 71.7 |
| *Lifting 100 lb* |
| Andar vigorosamente 30 minutos 3 vezes por semana | 14 | 5.8 |
| *Walking briskly for 30 minutes 3 times a week* |
| Beber menos do que 2 bebidas alcoólicas por dia | 24 | 10 |
| *Drinking <2 alcohol drinks per day* |
| Parar de fumar | 29 | 12.1 |
| *Quitting cigarette smoking* |
